# Supplementary material for: Persisting symptoms three to eight months after non-hospitalized COVID-19, a prospective cohort study
Source: PLOS journal article supplement (doi:10.1371/journal.pone.0256142), 2021-08-26

## Flow diagram

Inclusion of participants in the Norwegian Corona Cohort

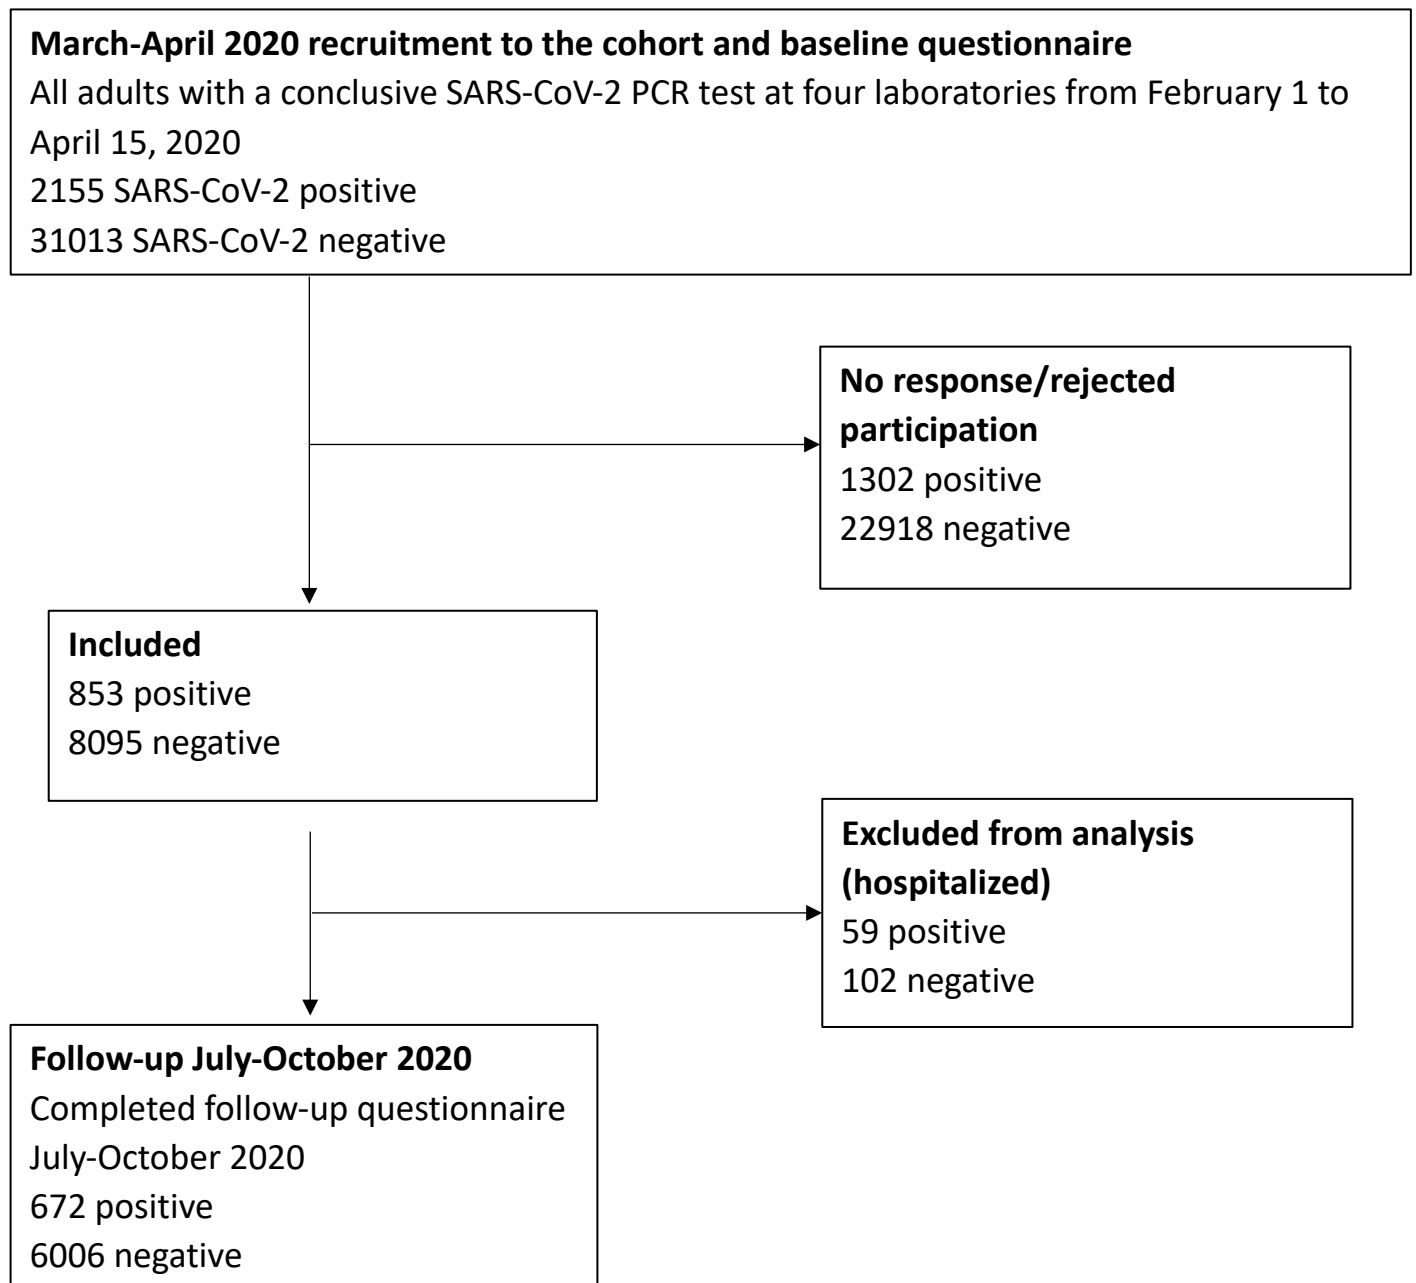

Supplement: S1 (10.1371/journal.pone.0256142.s001) [file journal.pone.0256142.s001]
